## **Correction: Diabetes Mellitus Increases the Risk of Active Tuberculosis: A Systematic Review of 13 Observational Studies**

**Christie Y. Jeon, Megan B. Murray**

Correction for:

Jeon CY, Murray MB (2008) Diabetes mellitus increases the risk of active tuberculosis: A systematic review of 13 observational studies. *PLoS Med* 5(7): e152. doi:10.1371/journal.pmed.0050152

In Box 1 (Search Strategy to Identify Observational Studies on the Association of Diabetes and Active Tuberculosis), the list of text terms for the PubMed search was incorrectly numbered.

The correct numbering is:

*Text terms*

4. "tuberculosis"
5. "diabetes" OR "glucose intolerance" OR "glucose tolerance" OR "insulin resistance"
6. "chronic disease(s)" OR "non-communicable disease(s)"
7. "risk factor(s)"

A corrected version of Box 1 is provided as a Supporting Information file.

### **Supporting Information**

Text S1.

Box 1: Search Strategy to Identify Observational Studies on the Association of Diabetes and Active Tuberculosis

doi:10.1371/journal.pmed.0050181.sd001 (24 KB DOC).

Citation: Jeon CY, Murray MB (2008) Correction: Diabetes Mellitus Increases the Risk of Active Tuberculosis: A Systematic Review of 13 Observational Studies. *PLoS Med* 5(8): e181. doi:10.1371/journal.pmed.0050181

Received: July 17, 2008; Accepted: July 17, 2008; Published: August 26, 2008.

Copyright: © 2008 Jeon and Murray. This is an open-access article distributed under the terms of the Creative Commons Attribution License, which permits unrestricted use, distribution, and reproduction in any medium, provided the original author and source are credited.
